# Supplementary material
Source: PubMed Central journal article supplement (PMC3471740)
Supplement: supp_M112.389338_jbc.M112.389338-1.pdf [file supp_M112.389338_jbc.M112.389338-1.pdf]

Table S1  
Oligonucleotides used in this experiment.

| Primer   | Primer sequence(underlined indicate restriction sites) | Purpose                           |
|----------|--------------------------------------------------------|-----------------------------------|
| Primer 1 | 5'-AAAACATATGGGCTCAAAGCACCCAAGG-3'                     | Cloning of<br>LmNcb5or            |
| Primer 2 | 5'-AAAAGGATCCCATCTCCCCTACAGGTGG-3'                     |                                   |
| Primer3  | 5'-AAAAAAGCTTCAGTATCCGTATCTACGACTCG-3'                 | 5' flanking<br>region             |
| Primer4  | 5'-TGTGTCTGCGCTGACCGCAGC-3'                            |                                   |
| Primer5  | 5'-AAAACCCGGGGATGCACCGCAGGCAGCTG-3'                    | 3' flanking<br>region             |
| Primer6  | 5'-AAAAGGATCCGAAGCGTCCTTGACGATGGTG-3'                  |                                   |
| Primer7  | 5'-GAGCGTGAGATGCAGGTGTA-3'                             | External primer<br>for testing KO |
| Primer8  | 5'-CACCCCTGTGTGACTCAATG-3'                             |                                   |
| Primer9  | 5'-CTGGCGAAGGAGATGGTGAAG-3'                            | internal primer<br>for testing KO |
| Primer10 | 5'-CGTGCGAAGCGAAGGATGTG-3'                             |                                   |
| Primer11 | 5'-AAAACCCGGGCGCATGGGCTCAAAGCACCCAAG-3'                | over-expression                   |
| Primer12 | 5'-AAAAGGATCCCTACAGGTGGTGAACCTGTGTGGCAG-3'             |                                   |
