# Supplementary material
Source: PubMed Central journal article supplement (PMC3471740)

Figure S1. Analysis of mass spectra of 8 peaks (methyl esters of fatty acids from *L. major* cell lysate) in Figure 4.

Peak 1: methyl ester of palmitate (16:0)

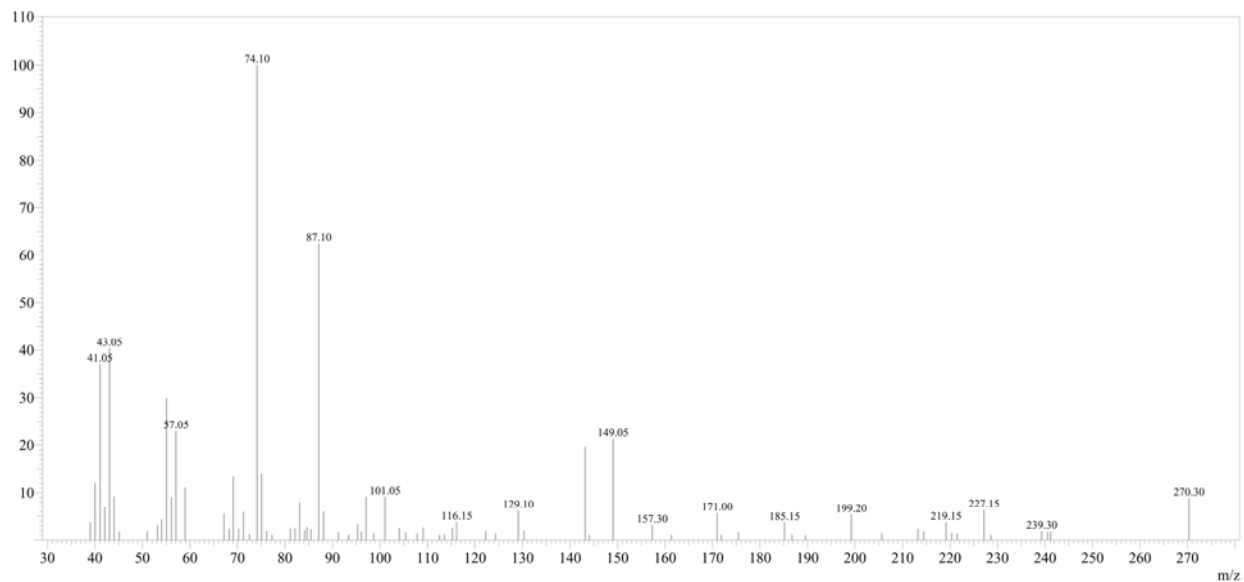

Peak 2: methyl ester of stearate (18:0)

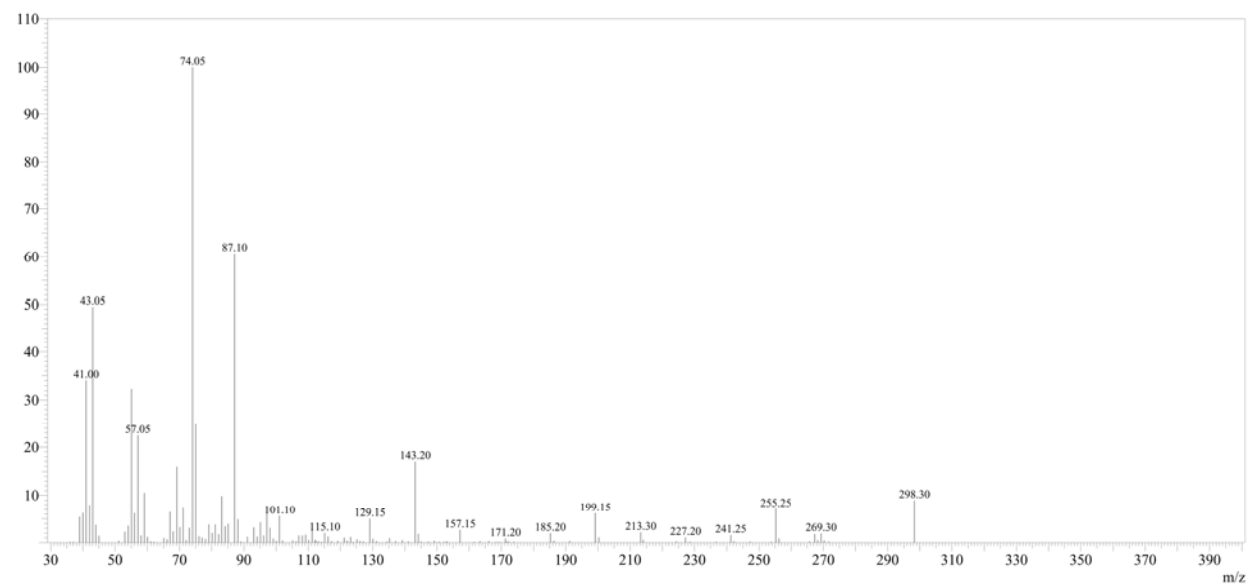

Peak 3: methyl ester of oleate (18:1)

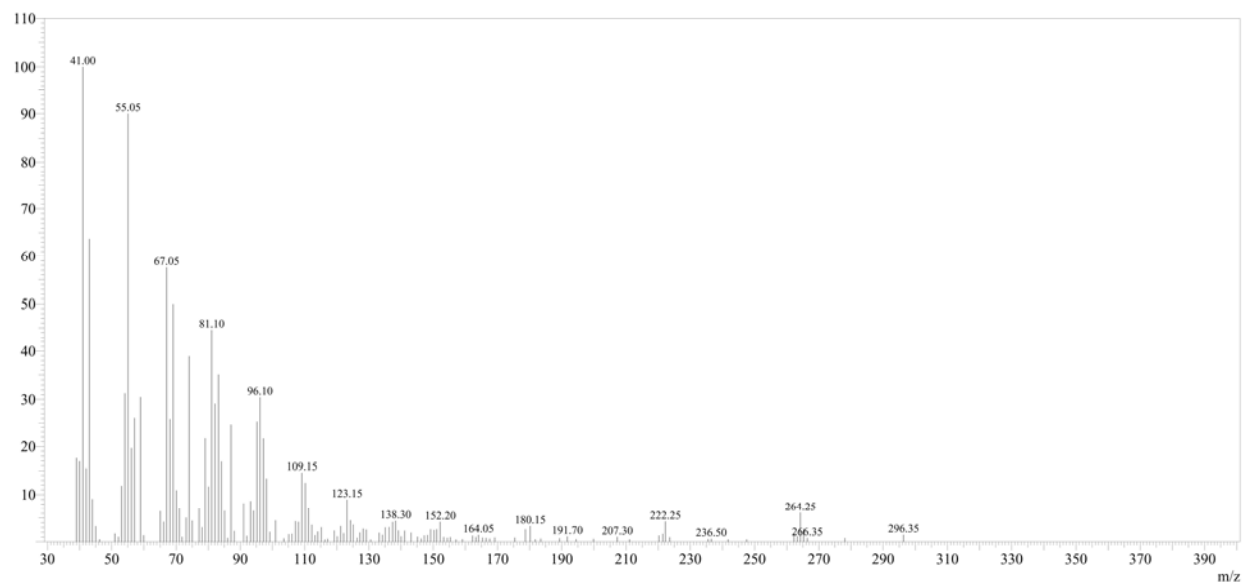

Peak 4: methyl ester of linoleate (18:2)

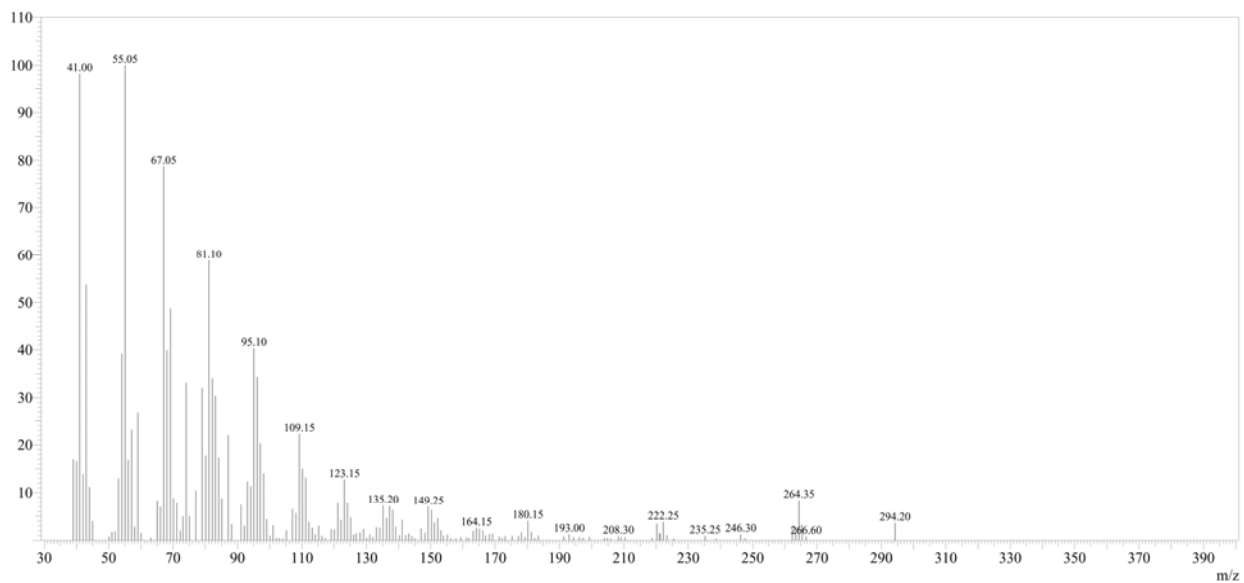

Peak 5: methyl ester of linolenate (18:3)

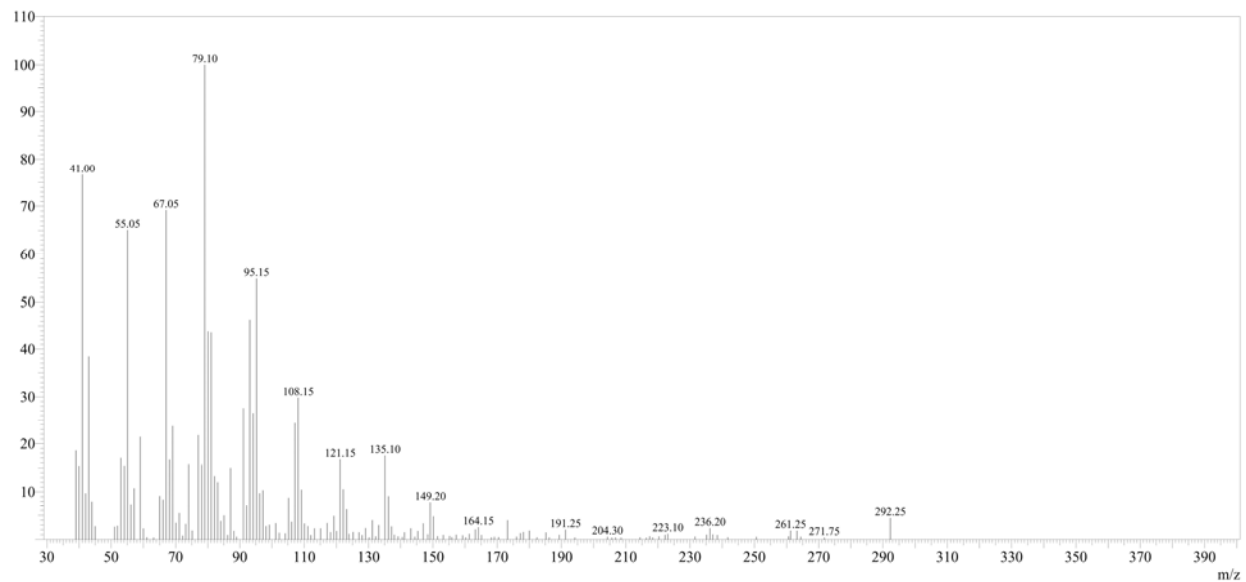

Peak 6: methyl ester of eicosatrienate (20:3)

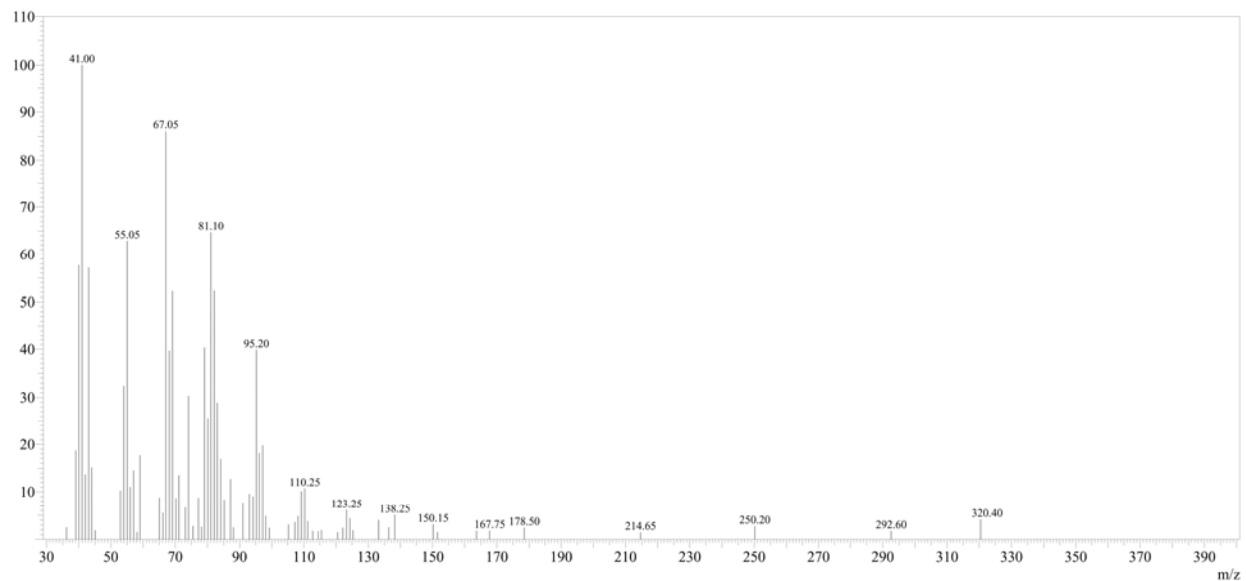

Peak 7: methyl ester of arachidonate (20:4)

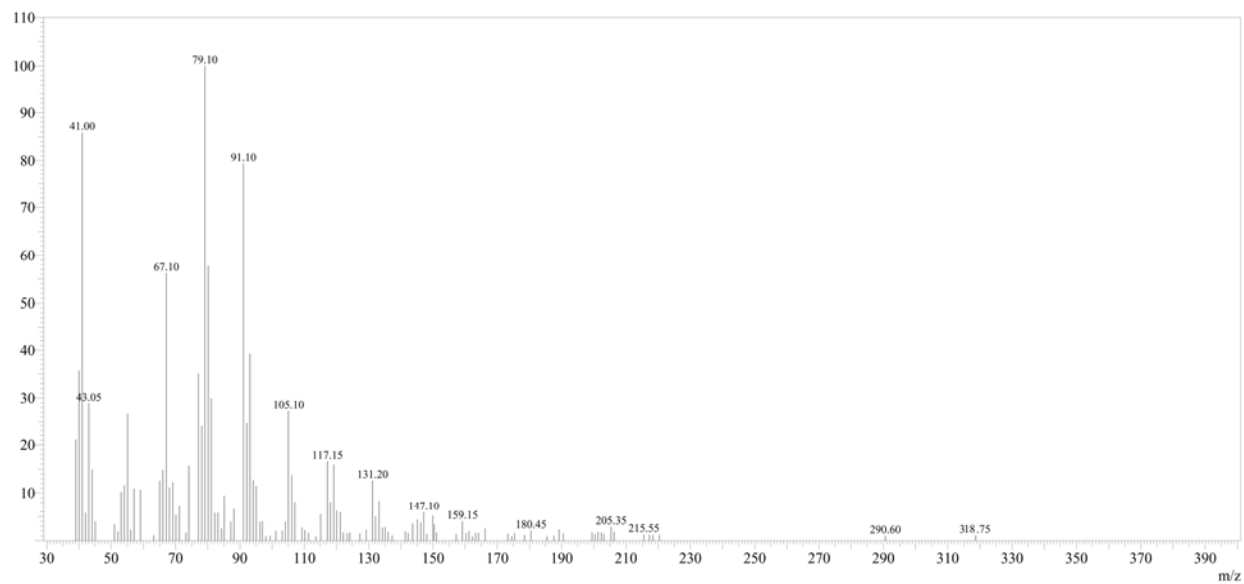

Peak 8: methyl ester of docosahexaenate (22:6)

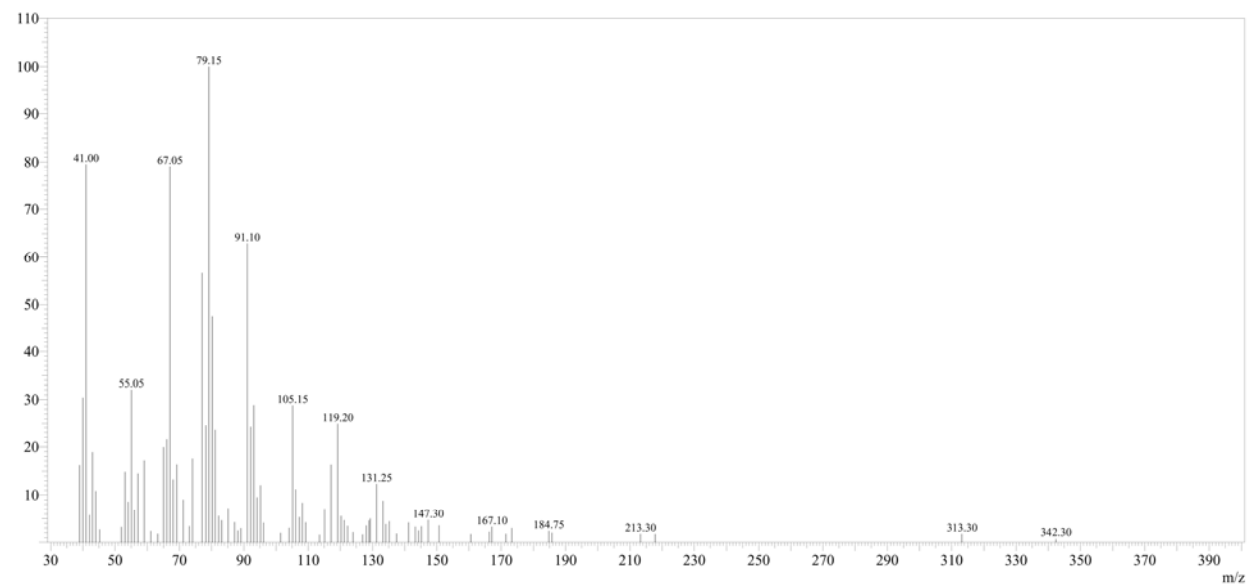

Figure S2. Comparative analysis of oxygen consumption of digitonin-permeabilized OE, WT and KO cells during the rapid burst of state 3 respiration by addition of 0.1 mM ADP. 2.5 mM succinate was used as respiratory substrates. L and O indicate BSA conjugated linoleate and oleate preincubated cells, respectively. Preincubated cells were washed by PBS buffer for removing BSA conjugated linoleate or oleate before starting the experiment.

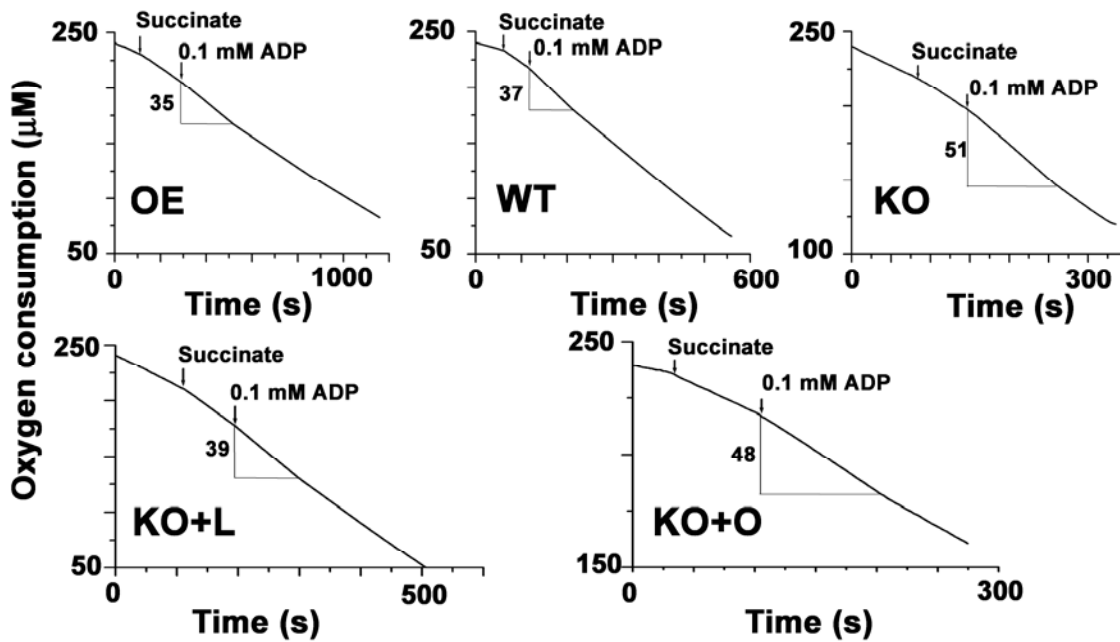

Supplement: supp_M112.389338_jbc.M112.389338-2.pdf [file supp_M112.389338_jbc.M112.389338-2.pdf]
